# Supplementary material for: Astaxanthin decreased oxidative stress and inflammation and enhanced immune response in humans
Source: Springer Nature journal article supplement (doi:10.1186/1743-7075-7-18), 2010-03-05

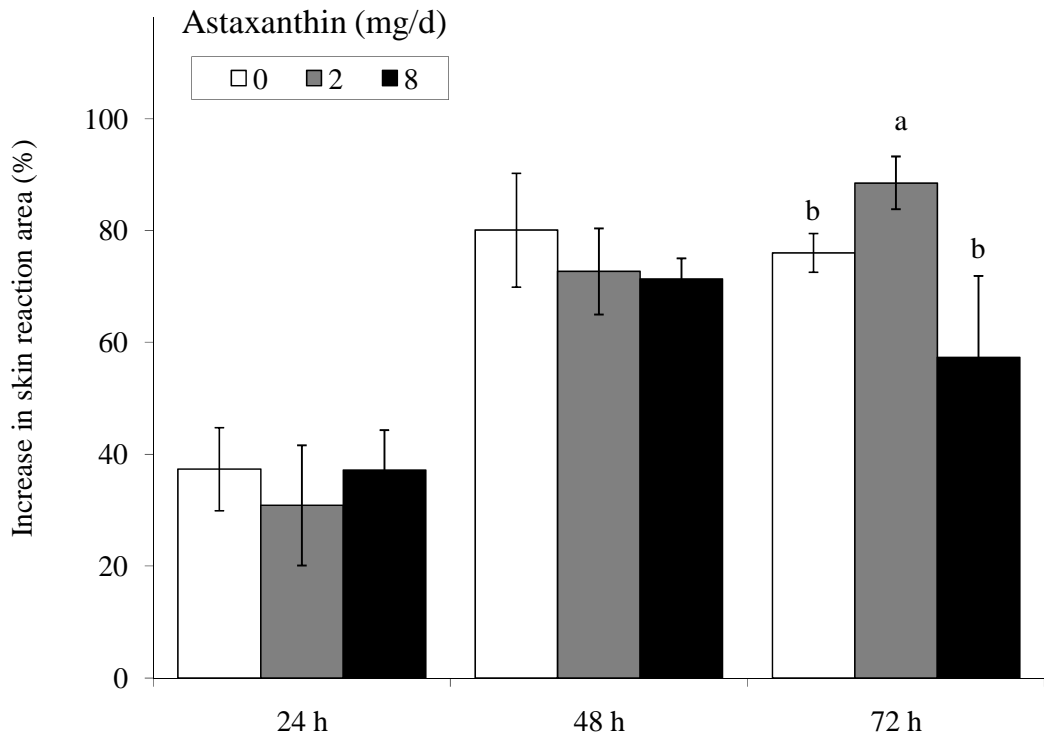

Supplement: 12986_2010_230_MOESM3_ESM.pdf [file 12986_2010_230_MOESM3_ESM.pdf]
